# Supplementary material for: Validity of using perceived exertion to assess muscle fatigue during resistance exercises
Source: PeerJ. 2022 Mar 1;10:e13019. doi: 10.7717/peerj.13019 (PMC8896022; doi:10.7717/peerj.13019)
Supplement: Supplemental Information 2 — The raw data of perceived exertion (RPE), spectral fatigue index (FInsm5), and mean velocity measures of the entire participants group. [file peerj-10-13019-s002.xlsx]

## Sheet: sEMG
BI: Biceps Brachii
BR: Brachioradialis
TRI: Triceps Brachii
VM: Vastus Medialis
VL: Vastus Lateralis
BF: Biceps Femoris
EF: Elbow Flexion
KE: Knee Extension
L: Low volume condition
M: Medium volume condition
H: High volume condition
Participant1																						Participant1
EF																						KE
L	BI	BR	TRI				M	BI	BR	TRI				H	BI	BR	TRI					L	VM	VL	BF				M	VM	VL	BF				H	VM	VL	BF
Rep1	1	1	1				Rep1	1	1	1				Rep1	1	1	1					Rep1	1	1	1				Rep1	1	1	1				Rep1	1	1	1
Rep2	1.16621	1.02183	1.26833				Rep2	1.28962	1.08061	1.25226				Rep2	1.29898	1.11615	1.20432					Rep2	0.917955	0.896744	1.00634				Rep2	0.965858	1.07761	0.948345				Rep2	0.993712	0.966342	0.98312
Rep3	1.26851	1.27837	1.48195				Rep3	1.38888	1.18111	1.33469				Rep3	1.35675	1.21572	1.31127					Rep3	0.986467	0.992253	1.0337				Rep3	1.02211	1.04458	0.935727				Rep3	0.920301	0.979511	0.775019
							Rep4	1.57697	1.34473	1.64716				Rep4	1.66546	1.24101	1.4546					Rep4	1.02638	0.974182	0.982208				Rep4	0.936508	1.04058	1.03748				Rep4	1.08457	0.933956	0.899242
							Rep5	1.74777	1.41222	1.61601				Rep5	1.83875	1.44592	1.73029					Rep5	1.05523	1.00719	0.993085				Rep5	1.0453	1.16067	1.06507				Rep5	0.909804	0.903491	0.738154
							Rep6	1.85215	1.757	1.73838				Rep6	2.08814	1.61003	1.83946												Rep6	1.11859	1.06043	0.952264				Rep6	1.09189	1.01754	0.845425
														Rep7	2.19405	1.96968	2.2786												Rep7	1.08656	1.15534	1.14673				Rep7	1.03485	0.998377	0.983004
														Rep8	2.35249	2.67974	3.46107												Rep8	1.11737	1.2335	1.11555				Rep8	1.11385	0.977193	0.82538
																													Rep9	1.06152	1.17103	1.05531				Rep9	1.08797	1.1762	0.977948
																													Rep10	1.10812	1.17056	1.20093				Rep10	1.07282	1.08676	0.979533
																																				Rep11	1.19666	1.21408	1.04501
																																				Rep12	1.21046	1.09463	1.0181
																																				Rep13	1.11268	1.16202	1.13378
																																				Rep14	1.17941	1.17478	1.15432
																																				Rep15	1.24594	1.24467	1.07072
Participant2																						Participant2
EF																						KE
L	BI	BR	TRI				M	BI	BR	TRI				H	BI	BR	TRI					L	VM	VL	BF				M	VM	VL	BF				H	VM	VL	BF
Rep1	1	1	1				Rep1	1	1	1				Rep1	1	1	1					Rep1	1	1	1				Rep1	1	1	1				Rep1	1	1	1
Rep2	0.959167	0.883004	1.0648				Rep2	1.10407	1.23191	1.14831				Rep2	0.964113	0.815457	1.19205					Rep2	1.07156	0.939477	1.17804				Rep2	0.934117	0.959634	1.20084				Rep2	1.08342	1.2829	1.18419
Rep3	1.00546	0.988188	1.1687				Rep3	1.19044	1.17748	1.20324				Rep3	1.10604	0.907796	1.16636					Rep3	0.916065	0.959188	1.20655				Rep3	0.965328	1.03816	1.16129				Rep3	1.16931	1.27523	1.19066
							Rep4	1.31125	1.1671	1.33937				Rep4	1.19716	0.829768	1.39716					Rep4	0.832214	0.859935	0.966972				Rep4	0.951557	1.03037	1.20751				Rep4	1.05646	1.20877	1.34518
							Rep5	1.25732	1.23852	1.30959				Rep5	1.21688	0.916093	1.35406					Rep5	0.991676	0.986086	1.07646				Rep5	0.938967	0.910075	1.26417				Rep5	1.05386	1.32426	1.20825
							Rep6	1.19515	1.57272	1.43822				Rep6	1.41133	1.01649	1.32915												Rep6	0.9849	0.949545	1.30689				Rep6	1.12176	1.22072	1.23979
							Rep7	1.26958	1.3432	1.57698				Rep7	1.3369	0.960634	1.49212												Rep7	1.10241	0.986717	1.34668				Rep7	1.03686	1.16271	1.24434
														Rep8	1.37322	0.998479	1.41922												Rep8	0.935484	0.954475	1.31344				Rep8	1.04919	1.09481	1.28431
														Rep9	1.59275	1.2849	1.77156												Rep9	1.1272	1.22826	1.26468				Rep9	1.25084	1.23555	1.31758
														Rep10	1.61554	1.40758	1.95448												Rep10	0.908229	1.18028	1.12485				Rep10	1.08215	1.30289	1.32723
																																				Rep11	1.27665	1.41532	1.34492
																																				Rep12	1.21307	1.21034	1.3682
																																				Rep13	1.27363	1.67154	1.51875
																																				Rep14	1.32734	1.53321	1.48026
Participant3																						Participant3
EF																						KE
L	BI	BR	TRI				M	BI	BR	TRI				H	BI	BR	TRI					L	VM	VL	BF				M	VM	VL	BF				H	VM	VL	BF
Rep1	1	1	1				Rep1	1	1	1				Rep1	1	1	1					Rep1	1	1	1				Rep1	1	1	1				Rep1	1	1	1
Rep2	1.01649	0.98012	1.18898				Rep2	1.16375	1.09238	1.23156				Rep2	0.883251	1.03054	1.01534					Rep2	1.02289	0.899973	1.10422				Rep2	0.8696	1.0031	1.02771				Rep2	0.993724	1.0022	1.13316
Rep3	1.20237	1.06245	1.33339				Rep3	1.12775	1.14904	1.15807				Rep3	1.04813	1.14808	1.29133					Rep3	0.922643	1.04702	0.958888				Rep3	0.91878	1.16375	1.05921				Rep3	1.04614	1.02399	1.11945
Rep4	1.41352	1.07413	1.23679				Rep4	1.17279	1.21386	1.34349				Rep4	1.15763	1.15103	1.47635												Rep4	0.92656	1.04923	1.10267				Rep4	0.98752	1.13307	1.20643
Rep5	1.60544	1.10267	1.48343				Rep5	1.28079	1.09808	1.40667				Rep5	1.22857	1.09711	1.45071												Rep5	0.933176	1.208	1.14348				Rep5	1.07717	1.28	1.33467
Rep6	1.46636	1.30133	1.62992				Rep6	1.3263	1.19605	1.29223				Rep6	1.35276	1.31705	1.66218												Rep6	1.00115	1.23467	1.13932				Rep6	1.07403	1.25738	1.41669
							Rep7	1.45571	1.28915	1.42625				Rep7	1.33985	1.29194	1.55711																			Rep7	1.11313	1.40419	1.37062
							Rep8	1.48534	1.379	1.61499				Rep8	1.51897	1.37322	1.71425																			Rep8	1.15267	1.30761	1.54316
							Rep9	1.32364	1.3373	1.37287				Rep9	1.23191	1.24683	1.57906																			Rep9	1.25646	1.39813	1.45177
							Rep10	1.49944	1.41955	1.60257				Rep10	1.48286	1.2495	1.66826
							Rep11	1.69089	1.37563	1.72128				Rep11	1.55593	1.46169	1.97004
														Rep12	1.67058	1.28504	1.87689
														Rep13	1.65527	1.45154	1.8753
														Rep14	2.04816	1.68656	2.41944
Participant4																						Participant4
EF																						KE
L	BI	BR	TRI				M	BI	BR	TRI				H	BI	BR	TRI					L	VM	VL	BF				M	VM	VL	BF				H	VM	VL	BF
Rep1	1	1	1				Rep1	1	1	1				Rep1	1	1	1					Rep1	1	1	1				Rep1	1	1	1				Rep1	1	1	1
Rep2	1.20902	1.04098	1.01682				Rep2	1.15819	1.12471	1.09429				Rep2	1.15329	1.12359	1.30219					Rep2	1.12839	1.35081	1.32756				Rep2	0.954178	1.05235	1.17631				Rep2	0.850674	0.950354	0.991939
Rep3	1.36428	1.07518	1.21794				Rep3	1.14529	1.25537	1.059				Rep3	1.17259	0.993188	1.28952					Rep3	1.04166	1.25504	1.33694				Rep3	0.905725	1.09457	1.32086				Rep3	0.87485	1.02492	1.10734
							Rep4	1.1559	1.23873	1.12493				Rep4	1.4419	0.930734	1.36865					Rep4	1.01122	1.34728	1.37532				Rep4	0.912304	1.05543	1.20561				Rep4	0.966499	1.04922	1.02412
							Rep5	1.47228	1.08349	1.13646				Rep5	1.40364	0.996058	1.40002												Rep5	0.896621	1.0948	1.19986				Rep5	0.977868	1.01346	1.01415
							Rep6	1.51342	0.984382	1.19513				Rep6	1.66225	1.17254	1.31273												Rep6	0.929814	0.961213	1.22402				Rep6	0.959281	1.02184	1.11095
							Rep7	1.44381	1.04697	1.27541				Rep7	1.69472	1.09918	1.56066												Rep7	0.972274	1.07133	1.21042				Rep7	0.948851	1.06883	1.06992
														Rep8	1.70504	1.06491	1.49946												Rep8	0.92686	1.19132	1.23888				Rep8	0.992609	0.988028	1.10346
														Rep9	2.0835	1.19889	1.64269																			Rep9	1.04682	1.18491	1.11075
																																				Rep10	0.989253	1.21908	1.23712
																																				Rep11	0.968855	1.21059	1.25356
																																				Rep12	1.22678	1.40184	1.35897
Participant5																						Participant5
EF																						KE
L	BI	BR	TRI				M	BI	BR	TRI				H	BI	BR	TRI					L	VM	VL	BF				M	VM	VL	BF				H	VM	VL	BF
Rep1	1	1	1				Rep1	1	1	1				Rep1	1	1	1					Rep1	1	1	1				Rep1	1	1	1	1			Rep1	1	1	1	1
Rep2	1.03028	1.10149	0.967267				Rep2	1.00819	1.00281	1.02809				Rep2	1.16785	1.09627	1.1785					Rep2	0.98035	0.899806	0.989534				Rep2	0.879684	0.922474	0.969888	0.924015			Rep2	1.08041	0.991637	1.09293	1.05499
Rep3	1.20551	1.18285	0.932331				Rep3	1.15437	1.0358	1.09846				Rep3	1.16164	1.10531	1.21611					Rep3	0.928073	0.775539	0.952491				Rep3	0.815787	0.889197	1.03896	0.914648			Rep3	0.995448	0.986697	1.12737	1.0365
Rep4	1.40935	1.23665	0.985944				Rep4	1.19816	1.28837	1.09971				Rep4	1.31502	1.11563	1.3598					Rep4	0.958925	0.925903	0.964955				Rep4	0.819185	0.846595	0.898296	0.854692			Rep4	1.05268	1.17339	1.21053	1.14553
							Rep5	1.40823	1.21584	1.19754				Rep5	1.46993	1.155	1.56777					Rep5	0.944794	0.87807	0.956863				Rep5	0.856449	0.930389	1.09661	0.96115			Rep5	1.023	1.08047	1.16922	1.0909
							Rep6	1.38014	1.04658	1.04601				Rep6	1.74312	1.18189	1.48768					Rep6	0.918196	0.880005	1.08411				Rep6	0.949339	0.985721	1.02988	0.988315			Rep6	1.11267	1.1605	1.17874	1.15064
							Rep7	1.51219	1.27049	1.21894				Rep7	1.96822	1.19127	1.54135					Rep7	0.834107	0.847045	1.07193				Rep7	0.889218	1.01104	1.04336	0.981204			Rep7	1.13397	1.20315	1.29331	1.21014
							Rep8	1.56316	1.22893	1.27538				Rep8	1.70492	1.48971	1.69648												Rep8	0.997787	0.991577	1.04373	1.01103			Rep8	0.976512	1.10129	1.29035	1.12272
														Rep9	2.03891	1.45866	1.66537												Rep9	0.842964	0.987965	0.994265	0.941731			Rep9	0.996274	1.07144	1.2423	1.10334
														Rep10	1.80067	1.46219	1.48098												Rep10	0.87513	0.956918	1.09952	0.97719			Rep10	0.981823	1.22386	1.27784	1.16117
																													Rep11	0.923954	0.982425	1.11234	1.00624			Rep11	1.06687	1.23188	1.36906	1.2226
																													Rep12	1.00322	1.03099	1.11316	1.04913			Rep12	1.10814	1.30767	1.42709	1.28097
																													Rep13	0.91696	1.03026	1.19643	1.04788			Rep13	1.2245	1.43047	1.43472	1.36323
																																				Rep14	1.15394	1.42454	1.47175	1.35008
																																				Rep15	1.2664	1.42965	1.37932	1.35846
																																				Rep16	1.20517	1.36141	1.4492	1.33859
																																				Rep17	1.22279	1.555	1.57997	1.45259
																																				Rep18	1.13751	1.39137	1.4719	1.33359
																																				Rep19	1.10809	1.43428	1.5598	1.36739
																																				Rep20	1.19588	1.78009	1.90717	1.62771
Participant6																						Participant6
EF																						KE
L	BI	BR	TRI				M	BI	BR	TRI				H	BI	BR	TRI					L	VM	VL	BF				M	VM	VL	BF				H	VM	VL	BF
Rep1	1	1	1				Rep1	1	1	1				Rep1	1	1	1					Rep1	1	1	1				Rep1	1	1	1				Rep1	1	1	1
Rep2	1.14174	0.927706	1.0987				Rep2	1.21928	1.11561	1.04467				Rep2	1.14376	0.993343	1.10722					Rep2	0.818256	0.893914	0.832				Rep2	0.785338	1.05051	0.904324				Rep2	0.95847	0.926241	1.06043
Rep3	1.0747	1.02243	1.09583				Rep3	1.29671	1.14343	1.19028				Rep3	1.20115	1.02003	1.08196					Rep3	0.711723	0.815437	0.806794				Rep3	0.801758	1.00547	0.876287				Rep3	0.93946	0.922216	1.21108
Rep4	1.21534	1.00089	1.31412				Rep4	1.33801	1.25443	1.15874				Rep4	1.20489	1.0467	1.18404					Rep4	0.743205	0.88084	0.922951				Rep4	0.834922	0.933091	0.953984				Rep4	1.0205	0.982699	1.19543
							Rep5	1.82465	1.34507	1.19457				Rep5	1.30761	1.14343	1.67164												Rep5	0.823657	0.852107	1.05258				Rep5	1.07273	0.932057	1.14396
							Rep6	1.70992	1.27842	1.23266				Rep6	1.41619	1.15013	1.45701												Rep6	0.857454	0.99018	1.17334				Rep6	1.20154	0.988292	1.51245
							Rep7	1.87258	1.52678	1.23169				Rep7	1.57838	1.21462	1.62556												Rep7	1.00249	1.1551	1.20951				Rep7	1.07881	1.09011	1.37987
														Rep8	1.77143	1.27028	1.40862												Rep8	1.05044	1.2604	1.35867				Rep8	1.18184	1.05448	1.469
														Rep9	1.82329	1.39876	1.58044																			Rep9	1.22168	1.10782	1.52085
														Rep10	1.9776	1.33618	1.77963																			Rep10	1.30298	1.24445	1.69383
														Rep11	1.84887	1.31504	1.29277																			Rep11	1.3178	1.09768	1.77053
																																				Rep12	1.35684	1.3436	1.93039
Participant7																						Participant7
EF																						KE
L	BI	BR	TRI				M	BI	BR	TRI				H	BI	BR	TRI					L	VM	VL	BF				M	VM	VL	BF				H	VM	VL	BF
Rep1	1	1	1				Rep1	1	1	1				Rep1	1	1	1					Rep1	1	1	1				Rep1	1	1	1				Rep1	1	1	1
Rep2	1.12739	1.04623	1.00165				Rep2	0.969264	0.945829	0.984789				Rep2	0.979537	1.11011	0.970793					Rep2	0.865076	0.929054	0.964563				Rep2	1.02062	1.08885	1.04955				Rep2	0.985142	0.933691	1.01613
Rep3	1.00019	0.971932	1.06179				Rep3	1.14125	1.03902	0.962973				Rep3	1.22832	1.18808	1.12318					Rep3	0.839675	0.927209	1.00162				Rep3	1.06893	1.05762	0.934323				Rep3	0.949301	0.916187	0.93917
Rep4	1.05168	0.949032	1.00793				Rep4	1.13121	1.01388	0.984492				Rep4	1.20736	1.26291	1.05922												Rep4	0.823475	1.13766	0.966994				Rep4	0.973258	1.08979	0.8549
							Rep5	1.1371	1.01864	0.97041				Rep5	1.26392	1.255	1.11611												Rep5	0.805984	0.988113	0.833957				Rep5	1.10033	1.11447	0.870434
							Rep6	1.17717	1.06559	0.990325				Rep6	1.27555	1.26521	1.03328												Rep6	0.908148	1.06841	0.906382				Rep6	1.03454	1.00318	0.950396
							Rep7	1.19806	1.13379	1.01296				Rep7	1.41839	1.32187	1.01833																			Rep7	1.05853	1.00534	0.975477
														Rep8	1.29109	1.20714	1.2369																			Rep8	1.03903	1.11802	0.95883
														Rep9	1.34372	1.1407	1.14679																			Rep9	0.951838	1.09445	0.98492
														Rep10	1.41227	1.30322	1.26788
														Rep11	1.26608	1.17188	1.11756
Participant8																						Participant8
EF																						KE
L	BI	BR	TRI				M	BI	BR	TRI				H	BI	BR	TRI					L	VM	VL	BF				M	VM	VL	BF				H	VM	VL	BF
Rep1	1	1	1				Rep1	1	1	1				Rep1	1	1	1					Rep1	1	1	1				Rep1	1	1	1				Rep1	1	1	1
Rep2	1.02198	1.05893	0.967736				Rep2	0.996708	1.03801	1.28159				Rep2	1.30727	0.948625	1.39285					Rep2	0.902137	0.84748	1.05129				Rep2	1.15093	0.951118	1.09978				Rep2	0.932279	0.945742	1.25552
Rep3	1.30905	1.17248	1.23398				Rep3	1.2102	1.13401	1.27637				Rep3	1.24999	0.963255	1.11695					Rep3	1.04441	0.918895	1.06379				Rep3	1.09882	0.989978	1.17438				Rep3	0.982974	1.00217	1.23105
							Rep4	1.43172	1.1006	1.21208				Rep4	1.60849	1.04678	1.47709					Rep4	1.07359	1.06026	1.16057				Rep4	1.04887	0.852581	1.13366				Rep4	0.970857	0.918076	1.12923
							Rep5	1.29259	1.14051	1.30386				Rep5	1.30286	1.01694	1.59113												Rep5	1.18623	1.09357	1.20205				Rep5	1.02893	1.05327	1.25547
							Rep6	1.50257	1.3191	1.35183				Rep6	1.57675	1.15313	1.45314												Rep6	1.1399	1.03612	1.20672				Rep6	1.19065	1.07459	1.27825
														Rep7	1.83249	1.1748	1.22609												Rep7	1.2498	1.18187	1.10191				Rep7	1.16721	1.22673	1.32865
														Rep8	1.59813	1.23748	1.61815																			Rep8	1.24765	1.16505	1.25724
														Rep9	1.61856	1.43833	1.38867																			Rep9	1.22733	1.23863	1.2697
																																				Rep10	1.20042	1.51464	1.44053
																																				Rep11	1.26135	1.39009	1.38328
Participant9																						Participant9
EF																						KE
L	BI	BR	TRI				M	BI	BR	TRI				H	BI	BR	TRI					L	VM	VL	BF				M	VM	VL	BF				H	VM	VL	BF
Rep1	1	1	1				Rep1	1	1	1				Rep1	1	1	1					Rep1	1	1	1				Rep1	1	1	1				Rep1	1	1	1
Rep2	0.96435	1.09649	0.9533				Rep2	0.962543	1.15721	1.03472				Rep2	0.985605	1.09205	1.13278					Rep2	1.10337	0.968552	0.941898				Rep2	0.900903	1.00993	1.17452				Rep2	0.990068	1.08281	1.05877
Rep3	1.1681	1.0556	1.1145				Rep3	1.01128	1.15366	1.07444				Rep3	1.25813	1.10193	1.22878					Rep3	0.889054	0.96916	1.03464				Rep3	1.11092	1.09354	1.17377				Rep3	0.952213	0.997063	1.01424
Rep4	0.984135	1.14231	1.03599				Rep4	1.20825	1.21061	1.15407				Rep4	1.42025	1.28302	1.15681					Rep4	0.915323	1.02226	1.01484				Rep4	0.815027	1.18223	1.18576				Rep4	0.995589	1.02225	1.10911
Rep5	1.13102	1.27203	1.06011				Rep5	1.26957	1.24327	1.15237				Rep5	1.48624	1.20937	1.41547					Rep5	0.850701	0.965581	0.947193				Rep5	1.09292	1.14859	1.19149				Rep5	0.973185	0.991302	1.05716
							Rep6	1.35554	1.3085	1.22553				Rep6	1.39971	1.17916	1.33409					Rep6	1.12852	0.873837	0.960192				Rep6	0.968327	1.03293	1.23161				Rep6	0.831433	0.978481	0.943944
							Rep7	1.5386	1.37231	1.19901				Rep7	1.63119	1.27206	1.48665					Rep7	1.00944	0.989945	0.902859				Rep7	0.958463	1.08766	1.19695				Rep7	0.923204	1.11956	1.15975
							Rep8	1.89912	1.52805	1.3174				Rep8	1.57535	1.32804	1.31264					Rep8	0.94062	0.942947	0.847242				Rep8	1.02621	1.03887	1.18418				Rep8	0.962509	1.01655	1.03384
							Rep9	1.75564	1.62278	1.38035				Rep9	1.63036	1.32728	1.27498					Rep9	0.830499	0.947228	0.828462				Rep9	0.975335	1.2416	1.23257				Rep9	0.914195	0.903749	0.998169
							Rep10	2.03342	1.60712	1.24606				Rep10	1.5724	1.35227	1.35839					Rep10	0.903307	1.00503	0.916292				Rep10	0.993995	1.07862	1.24797				Rep10	0.973065	1.02036	1.03966
														Rep11	1.77269	1.45768	1.36028					Rep11	0.887779	1.05321	0.968606				Rep11	0.978134	1.08501	1.18468				Rep11	0.940373	1.07024	1.08163
														Rep12	2.0137	1.50002	1.34195					Rep12	0.955215	1.00606	0.885038				Rep12	0.910587	1.08685	1.20563				Rep12	1.14448	1.08153	1.14991
														Rep13	2.1309	1.54459	1.39486					Rep13	0.866482	0.939955	0.890646				Rep13	0.847241	1.10646	1.01998				Rep13	1.09543	1.0548	1.06094
														Rep14	2.36806	1.5508	1.21693					Rep14	0.953244	0.988537	0.954337				Rep14	0.877521	1.24286	1.16961				Rep14	1.10535	1.22358	1.05058
														Rep15	2.43791	1.78994	1.52196												Rep15	0.782799	1.16763	1.10839				Rep15	0.924715	1.0184	1.00305
																													Rep16	0.709711	1.16488	0.944355				Rep16	0.926146	1.15554	1.02691
																													Rep17	0.749924	1.21228	1.0341				Rep17	1.01881	1.01735	1.09062
																													Rep18	0.800744	1.18695	1.01704				Rep18	0.914022	1.07059	0.98762
																													Rep19	0.890604	1.2223	1.07788				Rep19	1.03345	1.12569	0.89218
																													Rep20	0.739316	1.09387	0.848457				Rep20	0.952089	1.04843	0.974308
																													Rep21	0.883056	1.08735	1.06234				Rep21	0.979227	1.01664	1.04159
																													Rep22	0.874925	1.13516	0.989298				Rep22	0.951816	1.05022	1.03525
																													Rep23	0.743988	1.25918	0.918987				Rep23	1.02352	1.09089	1.0816
																													Rep24	0.81791	1.0862	1.11874				Rep24	0.832905	1.1556	1.10276
																													Rep25	0.756139	1.05827	1.04439				Rep25	1.0266	1.13168	0.859692
																													Rep26	0.6681	1.17933	1.03165				Rep26	0.978399	1.17461	0.971869
																													Rep27	0.76507	1.06996	1.00074				Rep27	0.853157	1.10562	0.967751
																																				Rep28	0.978674	0.98671	1.02999
																																				Rep29	1.00953	1.07816	1.04934
																																				Rep30	0.970624	0.898698	0.964736
																																				Rep31	0.832135	1.09128	0.927251
																																				Rep32	0.916397	1.1414	1.05288
																																				Rep33	1.03482	1.1588	0.926004
																																				Rep34	0.937958	1.1207	0.879612
																																				Rep35	1.12937	1.06016	0.861194
																																				Rep36	0.872857	1.14492	0.825007
																																				Rep37	0.997182	1.06564	0.887951
																																				Rep38	1.13003	1.11002	0.864421
																																				Rep39	1.06435	1.07782	0.840896
																																				Rep40	0.986109	1.08462	0.841378
																																				Rep41	1.06011	1.0231	0.910654
Participant10																						Participant10
EF																						KE
L	BI	BR	TRI				M	BI	BR	TRI				H	BI	BR	TRI					L	VM	VL	BF				M	VM	VL	BF				H	VM	VL	BF
Rep1	1	1	1				Rep1	1	1	1				Rep1	1	1	1					Rep1	1	1	1				Rep1	1	1	1				Rep1	1	1	1
Rep2	1.04216	1.12787	1.20711				Rep2	1.18575	1.03847	1.12821				Rep2	1.00262	1.1994	1.05833					Rep2	1.16193	1.09527	0.999295				Rep2	0.948751	0.935661	1.01616				Rep2	0.983604	1.00091	1.14122
Rep3	1.24772	1.21589	1.38794				Rep3	1.24827	1.16457	1.15937				Rep3	0.983499	1.31167	1.10539					Rep3	1.06963	1.17374	1.0122				Rep3	0.953871	1.00888	0.786372				Rep3	0.919058	0.952658	0.766713
Rep4	1.35755	1.17639	1.49923				Rep4	1.35451	1.2587	1.3823				Rep4	1.15689	1.33117	1.14513					Rep4	1.10863	1.16766	0.965871				Rep4	0.870369	0.922813	0.771435				Rep4	0.887213	0.922	0.708311
Rep5	1.21504	1.23619	1.3188				Rep5	1.44163	1.28667	1.37537				Rep5	1.03174	1.2513	1.22667					Rep5	1.03246	1.18128	1.00513				Rep5	0.967145	0.907905	0.692742				Rep5	0.96353	0.913006	0.698457
							Rep6	1.48145	1.43405	1.33819				Rep6	1.084	1.42106	1.27211					Rep6	1.0853	1.10462	1.06569				Rep6	0.902573	0.766985	0.743712				Rep6	0.889439	0.793812	0.678978
							Rep7	1.6706	1.50387	1.23137				Rep7	1.27786	1.32636	1.27753												Rep7	0.973474	0.916784	0.786956				Rep7	0.918006	1.00035	0.753887
							Rep8	1.79943	1.64944	1.40824				Rep8	1.185	1.59265	1.22787												Rep8	0.809376	0.744513	0.709233				Rep8	0.88583	1.02679	0.70294
							Rep9	2.01675	1.49249	1.38271				Rep9	1.51083	1.64842	1.61889												Rep9	0.902248	0.85484	0.827519				Rep9	0.94021	0.852725	0.744971
							Rep10	2.33817	1.59034	1.38355				Rep10	1.86398	1.81712	1.57423												Rep10	0.883435	0.763598	0.807475				Rep10	0.930484	0.971138	0.750306
														Rep11	1.83346	1.71388	1.49388												Rep11	0.822196	0.700507	0.72377				Rep11	0.973091	0.883673	0.734855
														Rep12	2.066	1.6174	1.46822												Rep12	0.983845	0.930732	0.7847				Rep12	0.912235	0.824589	0.754189
														Rep13	2.34075	1.83274	1.63358																			Rep13	1.01592	0.89082	0.750526
														Rep14	2.77333	2.0374	1.62172																			Rep14	0.927831	0.908577	0.798004
																																				Rep15	0.982913	0.893426	0.74918
																																				Rep16	0.968833	0.968517	0.880043
																																				Rep17	0.883992	0.912817	0.736461
																																				Rep18	0.927843	0.965124	0.820647
Participant11																						Participant11
EF																						KE
L	BI	BR	TRI				M	BI	BR	TRI				H	BI	BR	TRI					L	VM	VL	BF				M	VM	VL	BF				H	VM	VL	BF
Rep1	1	1	1				Rep1	1	1	1				Rep1	1	1	1					Rep1	1	1	1				Rep1	1	1	1				Rep1	1	1	1
Rep2	1.15813	1.18598	1.08071				Rep2	1.2328	1.17155	1.13039				Rep2	1.35508	1.04425	1.42056					Rep2	1.01537	1.09382	0.940959				Rep2	0.938207	1.14199	0.781784				Rep2	1.03589	0.94077	1.03539
							Rep3	1.54056	1.23622	1.0744				Rep3	1.41636	1.15569	1.41242					Rep3	1.06176	0.999546	1.01282				Rep3	0.898386	0.87836	0.725756				Rep3	0.900333	0.952215	0.97892
							Rep4	1.63037	1.35556	1.08573				Rep4	1.39889	1.14548	1.4371					Rep4	1.03596	1.08718	1.04184				Rep4	1.00805	1.04683	0.812675				Rep4	1.02706	0.980021	1.00031
							Rep5	1.69192	1.52454	1.10209				Rep5	1.48789	1.24659	1.52446												Rep5	0.942799	1.02051	0.745587				Rep5	0.958571	1.03155	1.03385
														Rep6	1.78636	1.3549	1.60156												Rep6	0.975083	1.01659	0.88326				Rep6	0.922105	0.984707	1.08552
														Rep7	2.02463	1.40614	1.59119												Rep7	0.971887	1.0359	0.842545				Rep7	1.02123	1.03539	0.997065
																																				Rep8	0.93967	1.04437	0.93652
																																				Rep9	0.941587	1.13007	1.11797
																																				Rep10	1.0703	1.08136	1.12283
																																				Rep11	1.04895	1.12416	1.03234
Participant12																						Participant12
EF																						KE
L	BI	BR	TRI				M	BI	BR	TRI				H	BI	BR	TRI					L	VM	VL	BF				M	VM	VL	BF				H	VM	VL	BF
Rep1	1	1	1				Rep1	1	1	1				Rep1	1	1	1					Rep1	1	1	1				Rep1	1	1	1				Rep1	1	1	1
Rep2	1.03609	1.28827	1.2653				Rep2	1.22229	1.15996	1.59411				Rep2	1.08063	1.07925	1.08402					Rep2	1.04426	1.08994	0.959298				Rep2	0.896692	0.990437	0.923108				Rep2	1.00589	0.969887	1.06288
Rep3	1.17855	1.14447	1.34316				Rep3	1.0834	1.1762	1.43032				Rep3	1.017	1.06696	2.05236					Rep3	0.968421	0.884279	1.00138				Rep3	0.928963	1.09724	1.16367				Rep3	1.21476	1.09535	1.30304
							Rep4	1.23582	1.28941	1.25895				Rep4	1.12919	1.08071	1.16555					Rep4	1.10449	1.08956	1.09711				Rep4	1.00281	1.02133	1.02545				Rep4	1.03249	1.08048	1.28305
							Rep5	1.41302	1.18611	1.47168				Rep5	1.44162	1.16349	1.08918					Rep5	1.05928	1.00231	1.16764				Rep5	0.927301	0.863177	1.00068				Rep5	0.988593	1.03655	1.21691
							Rep6	1.47761	1.30698	1.38123				Rep6	1.24205	1.1956	1.36072					Rep6	1.205	1.2634	1.24256				Rep6	0.904763	0.917678	1.09901				Rep6	1.04687	1.20001	1.32612
							Rep7	1.27148	1.18154	1.60023				Rep7	1.2677	1.33265	1.3424												Rep7	1.08398	0.990106	1.09576				Rep7	0.993219	1.15985	1.17347
														Rep8	1.35185	1.27792	1.37362												Rep8	0.894207	1.03785	1.15074				Rep8	1.14057	1.06341	1.27583
														Rep9	1.28565	1.1372	1.24195												Rep9	1.07155	0.917224	1.20314				Rep9	1.01298	1.13498	1.2232
														Rep10	1.35322	1.40721	1.48809												Rep10	1.13085	1.16083	1.25792				Rep10	1.18167	1.11478	1.41124
																																				Rep11	1.09483	1.30859	1.42176
																																				Rep12	1.19761	1.12488	1.32065
																																				Rep13	1.09333	1.15712	1.47193
																																				Rep14	1.12591	1.31892	1.52952
																																				Rep15	1.14831	1.39468	1.67476
																																				Rep16	1.0881	1.25649	1.5344
																																				Rep17	1.24958	1.27262	1.57069
Participant13																						Participant13
EF																						KE
L	BI	BR	TRI				M	BI	BR	TRI				H	BI	BR	TRI					L	VM	VL	BF				M	VM	VL	BF				H	VM	VL	BF
Rep1	1	1	1				Rep1	1	1	1				Rep1	1	1	1					Rep1	1	1	1				Rep1	1	1	1				Rep1	1	1	1
Rep2	1.21175	1.05932	1.16808				Rep2	1.06761	0.891433	1.07805				Rep2	0.983664	0.842293	1.19013					Rep2	1.0032	1.07807	0.89368				Rep2	0.956646	1.02346	1.00278				Rep2	1.09756	1.04081	1.29223
Rep3	1.15724	1.17182	1.24293				Rep3	1.12657	0.937553	1.1937				Rep3	1.29351	1.06035	1.32194					Rep3	1.10824	1.28356	0.860916				Rep3	0.887085	0.933352	1.08851				Rep3	1.12833	0.94717	1.47614
Rep4	1.45048	1.53781	1.48828				Rep4	1.22775	1.00007	1.1707				Rep4	1.16086	0.943231	1.32076					Rep4	0.951983	1.19498	0.904809				Rep4	0.909974	1.00968	1.18781				Rep4	1.07129	1.01266	1.80418
							Rep5	1.34316	1.00933	1.37796				Rep5	1.52147	1.20085	1.44857					Rep5	0.926282	1.16034	0.901055				Rep5	0.925818	1.02509	1.18186				Rep5	1.10979	0.926996	1.31502
							Rep6	1.46068	1.13344	1.19905				Rep6	1.46331	1.30707	1.68593												Rep6	0.934162	1.04765	1.15438				Rep6	1.11122	1.01468	1.40024
							Rep7	1.70042	1.29152	1.38135				Rep7	1.4169	1.30938	2.28643												Rep7	0.981407	1.11948	1.22914				Rep7	1.11748	1.07966	1.46823
							Rep8	1.61387	1.33923	1.35586				Rep8	1.87005	1.49321	1.81709												Rep8	0.875855	1.00297	1.25623				Rep8	1.19778	1.03743	1.39802
														Rep9	1.76673	1.45925	1.91861												Rep9	0.967482	0.96293	1.29249				Rep9	1.21761	1.05494	1.4348
														Rep10	1.82335	1.53313	2.07263												Rep10	0.886193	1.06757	1.32323				Rep10	1.20347	0.958708	1.49727
														Rep11	1.72924	1.5557	1.75937																			Rep11	1.09763	1.05426	1.43339
														Rep12	1.58623	1.5871	1.69612																			Rep12	1.18017	1.17672	1.49268
																																				Rep13	1.20341	0.971396	1.43916
																																				Rep14	1.16033	0.990388	1.52303
Participant14																						Participant14
EF																						KE
L	BI	BR	TRI				M	BI	BR	TRI				H	BI	BR	TRI					L	VM	VL	BF				M	VM	VL	BF				H	VM	VL	BF
Rep1	1	1	1				Rep1	1	1	1				Rep1	1	1	1					Rep1	1	1	1				Rep1	1	1	1				Rep1	1	1	1
Rep2	0.970749	0.915029	1.17496				Rep2	1.09854	1.02088	1.09896				Rep2	1.03536	1.06942	1.27318					Rep2	1.08694	0.927902	1.16423				Rep2	0.921027	0.984362	1.02058				Rep2	0.95052	1.03225	1.13928
Rep3	1.06142	1.02301	1.3818				Rep3	1.20106	1.19174	1.28015				Rep3	1.22554	1.02904	1.47821					Rep3	1.00387	1.01372	1.20477				Rep3	1.059	0.9603	0.938368				Rep3	1.04989	1.02809	1.19121
Rep4	1.11143	1.21907	1.50893				Rep4	1.18616	1.38892	1.39478				Rep4	1.38031	1.07679	1.62083					Rep4	1.006	1.11443	1.08212				Rep4	1.02439	1.03221	1.05855				Rep4	1.02704	1.01118	1.025
Rep5	1.12082	1.20859	1.57055				Rep5	1.29121	1.35555	1.37967				Rep5	1.41299	1.22923	1.63395					Rep5	0.964627	1.0791	1.14611				Rep5	1.01365	1.07575	1.05761				Rep5	1.06655	1.1071	1.10155
							Rep6	1.25092	1.41967	1.60019				Rep6	1.45244	1.16626	1.73378					Rep6	1.06486	0.981455	1.14027				Rep6	1.01472	1.09557	1.20429				Rep6	1.14824	1.1569	1.02083
							Rep7	1.52042	1.41814	1.59209				Rep7	1.57613	1.23409	1.8652					Rep7	1.09768	1.11343	1.10851				Rep7	1.04406	1.03197	1.17929				Rep7	0.999376	1.28034	0.936207
							Rep8	1.57712	1.50648	1.57687				Rep8	1.50958	1.34204	1.85656												Rep8	1.11351	1.07352	1.24824				Rep8	1.01516	1.15421	0.81947
							Rep9	1.86928	1.60069	1.6174				Rep9	1.88913	1.4671	1.88004												Rep9	1.05891	1.21646	1.27029				Rep9	1.05127	1.27354	0.884274
														Rep10	1.88931	1.3774	1.77644												Rep10	1.06735	1.20268	1.24527				Rep10	1.0715	1.25596	0.822915
														Rep11	2.10036	1.28735	1.8631												Rep11	1.2269	1.25437	1.33629				Rep11	1.10666	1.20367	0.803202
														Rep12	2.02649	1.36144	1.84574												Rep12	1.09723	1.19083	1.27616				Rep12	1.1127	1.34677	0.790389
														Rep13	2.71525	1.37753	1.80526												Rep13	1.207	1.21801	1.21519				Rep13	1.15932	1.16725	0.817073
														Rep14	2.98722	1.61721	1.97411												Rep14	1.14951	1.31944	1.42876				Rep14	1.19348	1.17653	0.872485
																																				Rep15	1.23529	1.23315	0.797115
																																				Rep16	1.09879	1.19778	0.841025
																																				Rep17	1.03573	1.28606	0.841221
																																				Rep18	1.19355	1.18597	0.870729
Participant15																						Participant15
EF																						KE
L	BI	BR	TRI				M	BI	BR	TRI				H	BI	BR	TRI					L	VM	VL	BF				M	VM	VL	BF				H	VM	VL	BF
Rep1	1	1	1				Rep1	1	1	1				Rep1	1	1	1					Rep1	1	1	1				Rep1	1	1	1				Rep1	1	1	1
Rep2	1.17405	1.05009	1.24258				Rep2	1.19694	0.925014	1.13007				Rep2	1.23588	1.06269	0.902477					Rep2	0.997824	1.03796	1.02381				Rep2	1.07677	1.02669	1.03547				Rep2	0.971959	0.977303	0.935238
Rep3	1.33261	1.09788	1.037				Rep3	1.17145	0.955137	0.945495				Rep3	1.17885	1.06012	0.957924					Rep3	0.957138	1.07241	1.15051				Rep3	1.05166	1.01714	1.23345				Rep3	0.995446	1.01105	1.02341
							Rep4	1.20948	1.05218	1.16063				Rep4	1.12435	1.17439	0.820726					Rep4	1.00606	1.20246	1.29015				Rep4	1.1274	1.07277	1.32679				Rep4	1.05611	1.05311	1.11385
							Rep5	1.26351	1.0651	0.961405				Rep5	1.22085	1.14366	0.916776												Rep5	1.14582	1.03938	1.29265				Rep5	1.08818	1.36756	1.19079
							Rep6	1.51222	1.20331	1.00699				Rep6	1.06189	1.19327	0.99026												Rep6	1.25609	1.15718	1.26129				Rep6	1.11077	1.17409	1.1401
							Rep7	1.32035	0.981343	0.877892				Rep7	1.27713	1.35523	0.950164												Rep7	1.36994	1.18027	1.46056				Rep7	1.15931	1.19885	1.26155
														Rep8	1.22807	1.26967	0.904325																			Rep8	1.11476	1.21327	1.28541
														Rep9	1.24918	1.49747	1.04341																			Rep9	1.13114	1.35905	1.25381
														Rep10	1.41347	1.44789	1.03006																			Rep10	1.3362	1.33505	1.3171
																																				Rep11	1.17207	1.41721	1.34401

## Sheet: RPE
EF: Elbow Flexion
KE: Knee Extension
L: Low volume condition
M: Medium volume condition
H: High volume condition
RPE: Ratings of perceived exertion scores
Participant1														Participant1
EF	L				M				H					KE	L				M				H
	RPE				RPE				RPE						RPE				RPE				RPE
Rep1	2			Rep1	4			Rep1	3					Rep1	5			Rep1	4			Rep1	3
Rep2	3			Rep2	4			Rep2	4					Rep2	5			Rep2	5			Rep2	4
Rep3	4			Rep3	5			Rep3	5					Rep3	6			Rep3	6			Rep3	4
RPE Overall	5			Rep4	6			Rep4	7					Rep4	7			Rep4	6			Rep4	4
				Rep5	7			Rep5	8					Rep5	7			Rep5	6			Rep5	5
				Rep6	8			Rep6	9					RPE Overall	9			Rep6	7			Rep6	5
				RPE Overall	9			Rep7	9									Rep7	7			Rep7	5
								Rep8	10									Rep8	8			Rep8	5
								RPE Overall	10									Rep9	8			Rep9	5
																		Rep10	8			Rep10	6
																		RPE Overall	9			Rep11	6
																						Rep12	6
																						Rep13	7
																						Rep14	8
																						Rep15	8
																						RPE Overall	9
Participant2														Participant2
EF	L				M				H					KE	L				M				H
	RPE				RPE				RPE						RPE				RPE				RPE
Rep1	1			Rep1	2			Rep1	2					Rep1	3			Rep1	2			Rep1	4
Rep2	2			Rep2	3			Rep2	3					Rep2	4			Rep2	4			Rep2	4
Rep3	5			Rep3	5			Rep3	5					Rep3	4			Rep3	5			Rep3	4
RPE Overall	4			Rep4	6			Rep4	6					Rep4	5			Rep4	6			Rep4	5
				Rep5	8			Rep5	8					Rep5	5			Rep5	7			Rep5	6
				Rep6	9			Rep6	9					RPE Overall	5			Rep6	7			Rep6	7
				Rep7	9			Rep7	9									Rep7	8			Rep7	7
				RPE Overall	8			Rep8	10									Rep8	8			Rep8	8
								Rep9	10									Rep9	8			Rep9	8
								Rep10	10									Rep10	9			Rep10	8
								RPE Overall	10									RPE Overall	8			Rep11	9
																						Rep12	9
																						Rep13	10
																						Rep14	10
																						RPE Overall	10
Participant3														Participant3
EF	L				M				H					KE	L				M				H
	RPE				RPE				RPE						RPE				RPE				RPE
Rep1	1			Rep1	0.5			Rep1	3					Rep1	2			Rep1	1			Rep1	0.5
Rep2	2			Rep2	1			Rep2	3					Rep2	3			Rep2	2			Rep2	1
Rep3	3			Rep3	1			Rep3	4					Rep3	4			Rep3	3			Rep3	2
Rep4	4			Rep4	2			Rep4	4					RPE Overall	3			Rep4	4			Rep4	3
Rep5	4			Rep5	3			Rep5	4									Rep5	6			Rep5	4
Rep6	5			Rep6	4			Rep6	5									Rep6	7			Rep6	5
RPE Overall	4			Rep7	4			Rep7	6									RPE Overall	6			Rep7	7
				Rep8	5			Rep8	7													Rep8	8
				Rep9	6			Rep9	8													Rep9	9
				Rep10	7			Rep10	9													RPE Overall	6
				Rep11	8			Rep11	9
				RPE Overall	7			Rep12	9
								Rep13	10
								Rep14	10
								RPE Overall	9
Participant4														Participant4
EF	L				M				H					KE	L				M				H
	RPE				RPE				RPE						RPE				RPE				RPE
Rep1	1			Rep1	1			Rep1	1					Rep1	1			Rep1	1			Rep1	1
Rep2	2			Rep2	2			Rep2	2					Rep2	2			Rep2	2			Rep2	2
Rep3	2			Rep3	3			Rep3	3					Rep3	3			Rep3	3			Rep3	2
RPE Overall	2			Rep4	4			Rep4	5					Rep4	4			Rep4	3			Rep4	3
				Rep5	5			Rep5	6					RPE Overall	5			Rep5	4			Rep5	3
				Rep6	7			Rep6	7									Rep6	5			Rep6	4
				Rep7	8			Rep7	8									Rep7	5			Rep7	5
				RPE Overall	9			Rep8	8									Rep8	6			Rep8	6
								Rep9	9									RPE Overall	6			Rep9	6
								RPE Overall	10													Rep10	7
																						Rep11	7
																						Rep12	8
																						RPE Overall	8
Participant5														Participant5
EF	L				M				H					KE	L				M				H
	RPE				RPE				RPE						RPE				RPE				RPE
Rep1	0			Rep1	0			Rep1	0					Rep1	0			Rep1	0			Rep1	0
Rep2	0			Rep2	0.5			Rep2	0.5					Rep2	0			Rep2	0			Rep2	1
Rep3	1			Rep3	0.5			Rep3	1					Rep3	0.5			Rep3	0.5			Rep3	1
Rep4	1			Rep4	0.5			Rep4	2					Rep4	0.5			Rep4	1			Rep4	1
RPE Overall	0.5			Rep5	1			Rep5	4					Rep5	1			Rep5	1			Rep5	2
				Rep6	1			Rep6	4					Rep6	1			Rep6	2			Rep6	2
				Rep7	2			Rep7	5					Rep7	2			Rep7	2			Rep7	3
				Rep8	3			Rep8	7					RPE Overall	2			Rep8	3			Rep8	3
				RPE Overall	2			Rep9	9									Rep9	3			Rep9	4
								Rep10	10									Rep10	4			Rep10	4
								RPE Overall	8									Rep11	4			Rep11	4
																		Rep12	5			Rep12	5
																		Rep13	5			Rep13	6
																		RPE Overall	6			Rep14	6
																						Rep15	8
																						Rep16	7
																						Rep17	8
																						Rep18	9
																						Rep19	10
																						Rep20	10
																						RPE Overall	7
Participant6														Participant6
EF	L				M				H					KE	L				M				H
	RPE				RPE				RPE						RPE				RPE				RPE
Rep1	0.5			Rep1	0			Rep1	0					Rep1	0.5			Rep1	0.5			Rep1	0.5
Rep2	0.5			Rep2	0.5			Rep2	0.5					Rep2	1			Rep2	1			Rep2	1
Rep3	1			Rep3	0.5			Rep3	1					Rep3	1			Rep3	1			Rep3	1
Rep4	2			Rep4	1			Rep4	1					Rep4	2			Rep4	2			Rep4	2
RPE Overall	1			Rep5	1			Rep5	1					RPE Overall	1			Rep5	2			Rep5	4
				Rep6	1			Rep6	2									Rep6	4			Rep6	4
				Rep7	2			Rep7	2									Rep7	5			Rep7	5
				RPE Overall	2			Rep8	4									Rep8	5			Rep8	5
								Rep9	4									RPE Overall	4			Rep9	7
								Rep10	5													Rep10	7
								Rep11	7													Rep11	7
								RPE Overall	5													Rep12	7
																						RPE Overall	7
Participant7														Participant7
EF	L				M				H					KE	L				M				H
	RPE				RPE				RPE						RPE				RPE			RPE
Rep1	1			Rep1	1			Rep1	0.5					Rep1	1			Rep1	2		Rep1	0.5
Rep2	3			Rep2	2			Rep2	1					Rep2	2			Rep2	3		Rep2	1
Rep3	4			Rep3	4			Rep3	3					Rep3	3			Rep3	4		Rep3	3
Rep4	5			Rep4	5			Rep4	4					RPE Overall	2			Rep4	5		Rep4	4
RPE Overall	5			Rep5	7			Rep5	5									Rep5	6		Rep5	5
				Rep6	8			Rep6	6									Rep6	7		Rep6	6
				Rep7	9			Rep7	7									RPE Overall	6		Rep7	7
				RPE Overall	7			Rep8	8												Rep8	8
								Rep9	8												Rep9	9
								Rep10	9												RPE Overall	8
								Rep11	10
								RPE Overall	5
Participant8														Participant8
EF	L				M				H					KE	L				M				H
	RPE				RPE				RPE						RPE				RPE				RPE
Rep1	2			Rep1	4			Rep1	5					Rep1	4			Rep1	3			Rep1	2
Rep2	3			Rep2	5			Rep2	5					Rep2	5			Rep2	4			Rep2	3
Rep3	4			Rep3	5			Rep3	6					Rep3	6			Rep3	6			Rep3	3
RPE Overall	4			Rep4	6			Rep4	8					Rep4	7			Rep4	7			Rep4	4
				Rep5	7			Rep5	8					RPE Overall	7			Rep5	7			Rep5	4
				Rep6	8			Rep6	9									Rep6	9			Rep6	5
				RPE Overall	7			Rep7	9									Rep7	9			Rep7	6
								Rep8	10									RPE Overall	9			Rep8	7
								Rep9	10													Rep9	8
								RPE Overall	9													Rep10	9
																						Rep11	10
																						RPE Overall	10
Participant9														Participant9
EF	L				M				H					KE	L				M				H
	RPE				RPE				RPE						RPE				RPE				RPE
Rep1	0			Rep1	0			Rep1	0					Rep1	0			Rep1	0			Rep1	0
Rep2	0.5			Rep2	0			Rep2	0					Rep2	0			Rep2	0			Rep2	0
Rep3	0.5			Rep3	0.5			Rep3	0					Rep3	0			Rep3	0			Rep3	0.5
Rep4	1			Rep4	1			Rep4	0					Rep4	0.5			Rep4	0			Rep4	0.5
Rep5	3			Rep5	3			Rep5	1					Rep5	1			Rep5	0			Rep5	1
RPE Overall	3			Rep6	4			Rep6	1					Rep6	1			Rep6	0			Rep6	1
				Rep7	5			Rep7	1					Rep7	1			Rep7	1			Rep7	1
				Rep8	5			Rep8	4					Rep8	1			Rep8	1			Rep8	2
				Rep9	6			Rep9	4					Rep9	2			Rep9	2			Rep9	2
				Rep10	7			Rep10	5					Rep10	2			Rep10	1			Rep10	2
				RPE Overall	7			Rep11	5					Rep11	2			Rep11	2			Rep11	3
								Rep12	5					Rep12	3			Rep12	2			Rep12	3
								Rep13	6					Rep13	3			Rep13	2			Rep13	4
								Rep14	7					Rep14	3			Rep14	3			Rep14	4
								Rep15	8					RPE Overall	4			Rep15	3			Rep15	4
								RPE Overall	8									Rep16	3			Rep16	4
																		Rep17	4			Rep17	5
																		Rep18	4			Rep18	5
																		Rep19	4			Rep19	5
																		Rep20	4			Rep20	5
																		Rep21	4			Rep21	6
																		Rep22	5			Rep22	6
																		Rep23	5			Rep23	6
																		Rep24	5			Rep24	6
																		Rep25	5			Rep25	7
																		Rep26	6			Rep26	7
																		Rep27	6			Rep27	7
																		RPE Overall	7			Rep28	8
																						Rep29	8
																						Rep30	8
																						Rep31	8
																						Rep32	8
																						Rep33	8
																						Rep34	8
																						Rep35	8
																						Rep36	8
																						Rep37	8
																						Rep38	8
																						Rep39	9
																						Rep40	9
																						Rep41	9
																						RPE Overall	9
Participant10														Participant10
EF	L				M				H					KE	L				M				H
	RPE				RPE				RPE						RPE				RPE				RPE
Rep1	0.5			Rep1	0.5			Rep1	1					Rep1	0			Rep1	0			Rep1	0
Rep2	1			Rep2	0.5			Rep2	1					Rep2	0.5			Rep2	0.5			Rep2	0.5
Rep3	2			Rep3	1			Rep3	2					Rep3	0.5			Rep3	1			Rep3	1
Rep4	2			Rep4	2			Rep4	3					Rep4	1			Rep4	1			Rep4	1
Rep5	4			Rep5	2			Rep5	4					Rep5	2			Rep5	2			Rep5	2
RPE Overall	4			Rep6	2			Rep6	4					Rep6	2			Rep6	2			Rep6	2
				Rep7	3			Rep7	5					RPE Overall	2			Rep7	2			Rep7	3
				Rep8	3			Rep8	6									Rep8	3			Rep8	3
				Rep9	4			Rep9	6									Rep9	4			Rep9	3
				Rep10	5			Rep10	6									Rep10	4			Rep10	4
				RPE Overall	6			Rep11	7									Rep11	4			Rep11	4
								Rep12	8									Rep12	5			Rep12	5
								Rep13	10									RPE Overall	4			Rep13	5
								Rep14	10													Rep14	5
								RPE Overall	10													Rep15	6
																						Rep16	6
																						Rep17	7
																						Rep18	7
																						RPE Overall	7
Participant11														Participant11
EF	L				M				H					KE	L				M				H
	RPE				RPE				RPE						RPE				RPE				RPE
Rep1	0			Rep1	0			Rep1	0					Rep1	0			Rep1	0			Rep1	0
Rep2	1			Rep2	0			Rep2	0.5					Rep2	1			Rep2	1			Rep2	0.5
RPE Overall	1			Rep3	1			Rep3	1					Rep3	1			Rep3	2			Rep3	0.5
				Rep4	1			Rep4	3					Rep4	2			Rep4	3			Rep4	1
				Rep5	5			Rep5	4					RPE Overall	1			Rep5	4			Rep5	2
				RPE Overall	2			Rep6	6									Rep6	4			Rep6	2
								Rep7	7									Rep7	5			Rep7	3
								RPE Overall	7									RPE Overall	4			Rep8	4
																						Rep9	5
																						Rep10	6
																						Rep11	6
																						RPE Overall	5
Participant12														Participant12
EF	L				M				H					KE	L				M				H
	RPE				RPE				RPE						RPE				RPE				RPE
Rep1	4			Rep1	4			Rep1	4					Rep1	3			Rep1	3			Rep1	4
Rep2	5			Rep2	5			Rep2	4					Rep2	3			Rep2	3			Rep2	4
Rep3	5			Rep3	6			Rep3	5					Rep3	4			Rep3	4			Rep3	5
RPE Overall	5			Rep4	6			Rep4	5					Rep4	5			Rep4	4			Rep4	5
				Rep5	7			Rep5	6					Rep5	5			Rep5	5			Rep5	6
				Rep6	8			Rep6	7					Rep6	6			Rep6	5			Rep6	6
				Rep7	8			Rep7	7					RPE Overall	4			Rep7	6			Rep7	7
				RPE Overall	6			Rep8	8									Rep8	6			Rep8	7
								Rep9	8									Rep9	7			Rep9	8
								Rep10	8									Rep10	7			Rep10	8
								RPE Overall	7									RPE Overall	6			Rep11	8
																						Rep12	9
																						Rep13	9
																						Rep14	9
																						Rep15	10
																						Rep16	10
																						Rep17	10
																						RPE Overall	9
Participant13														Participant13
EF	L				M				H					KE	L				M				H
	RPE				RPE				RPE						RPE				RPE				RPE
Rep1	1			Rep1	1			Rep1	1					Rep1	1			Rep1	1			Rep1	1
Rep2	1			Rep2	1			Rep2	1					Rep2	1			Rep2	1			Rep2	2
Rep3	2			Rep3	2			Rep3	2					Rep3	2			Rep3	2			Rep3	3
Rep4	3			Rep4	3			Rep4	3					Rep4	2			Rep4	2			Rep4	3
RPE Overall	3			Rep5	3			Rep5	3					Rep5	3			Rep5	3			Rep5	4
				Rep6	4			Rep6	4					RPE Overall	3			Rep6	3			Rep6	4
				Rep7	5			Rep7	5									Rep7	4			Rep7	5
				Rep8	5			Rep8	6									Rep8	5			Rep8	6
				RPE Overall	6			Rep9	7									Rep9	6			Rep9	6
								Rep10	8									Rep10	6			Rep10	7
								Rep11	9									RPE Overall	6			Rep11	8
								Rep12	9													Rep12	8
								RPE Overall	9													Rep13	9
																						Rep14	9
																						RPE Overall	9
Participant14														Participant14
EF	L				M				H					KE	L				M				H
	RPE				RPE				RPE						RPE				RPE				RPE
Rep1	3			Rep1	2			Rep1	0.5					Rep1	2			Rep1	1			Rep1	2
Rep2	4			Rep2	4			Rep2	2					Rep2	3			Rep2	1			Rep2	3
Rep3	6			Rep3	5			Rep3	3					Rep3	4			Rep3	2			Rep3	3
Rep4	7			Rep4	6			Rep4	4					Rep4	4			Rep4	2			Rep4	4
Rep5	8			Rep5	7			Rep5	4					Rep5	5			Rep5	3			Rep5	5
RPE Overall	5			Rep6	7			Rep6	5					Rep6	6			Rep6	4			Rep6	6
				Rep7	8			Rep7	6					Rep7	6			Rep7	4			Rep7	6
				Rep8	9			Rep8	7					RPE Overall	5			Rep8	5			Rep8	7
				Rep9	9			Rep9	7									Rep9	5			Rep9	7
				RPE Overall	8			Rep10	9									Rep10	5			Rep10	8
								Rep11	9									Rep11	6			Rep11	8
								Rep12	10									Rep12	6			Rep12	9
								Rep13	10									Rep13	7			Rep13	9
								Rep14	10									Rep14	8			Rep14	10
								RPE Overall	8									RPE Overall	7			Rep15	10
																						Rep16	10
																						Rep17	10
																						Rep18	10
																						RPE Overall	10
Participant15														Participant15
EF	L				M				H					KE	L				M				H
	RPE				RPE				RPE						RPE				RPE				RPE
Rep1	0			Rep1	0			Rep1	0					Rep1	0			Rep1	0			Rep1	0
Rep2	0.5			Rep2	0.5			Rep2	0.5					Rep2	0.5			Rep2	0.5			Rep2	0.5
Rep3	1			Rep3	1			Rep3	1					Rep3	1			Rep3	1			Rep3	1
RPE Overall	0.5			Rep4	2			Rep4	2					Rep4	2			Rep4	2			Rep4	2
				Rep5	3			Rep5	3					RPE Overall	2			Rep5	3			Rep5	3
				Rep6	4			Rep6	4									Rep6	4			Rep6	5
				Rep7	5			Rep7	5									Rep7	6			Rep7	7
				RPE Overall	2			Rep8	6									RPE Overall	4			Rep8	8
								Rep9	7													Rep9	9
								Rep10	9													Rep10	9
								RPE Overall	5													Rep11	10
																						RPE Overall	7

## Sheet: Velocity
EF: Elbow Flexion
KE: Knee Extension
L: Low volume condition
M: Medium volume condition
H: High volume condition
Participant1														Participant1
EF	L				M				H					KE	L				M				H
	Velocity(m/s)				Velocity(m/s)				Velocity(m/s)						Velocity(m/s)				Velocity(m/s)				Velocity(m/s)
Rep1	0.707			Rep1	0.848			Rep1	0.691					Rep1	0.791			Rep1	0.903			Rep1	0.842
Rep2	0.708			Rep2	0.795			Rep2	0.7					Rep2	0.814			Rep2	0.866			Rep2	0.856
Rep3	0.679			Rep3	0.711			Rep3	0.654					Rep3	0.835			Rep3	0.883			Rep3	0.849
				Rep4	0.623			Rep4	0.6					Rep4	0.818			Rep4	0.825			Rep4	0.855
				Rep5	0.607			Rep5	0.529					Rep5	0.808			Rep5	0.824			Rep5	0.854
				Rep6	0.555			Rep6	0.463									Rep6	0.825			Rep6	0.831
								Rep7	0.429									Rep7	0.808			Rep7	0.811
								Rep8	0.22									Rep8	0.803			Rep8	0.84
																		Rep9	0.789			Rep9	0.842
																		Rep10	0.804			Rep10	0.814
																						Rep11	0.807
																						Rep12	0.818
																						Rep13	0.786
																						Rep14	0.773
Participant2														Participant2
EF	L				M				H					KE	L				M				H
	Velocity(m/s)				Velocity(m/s)				Velocity(m/s)						Velocity(m/s)				Velocity(m/s)				Velocity(m/s)
Rep1	0.938			Rep1	0.549			Rep1	0.784					Rep1	0.774			Rep1	0.949			Rep1	0.781
Rep2	0.928			Rep2	0.914			Rep2	0.864					Rep2	0.956			Rep2	0.945			Rep2	0.911
Rep3	0.88			Rep3	0.891			Rep3	0.943					Rep3	0.935			Rep3	0.896			Rep3	0.899
				Rep4	0.971			Rep4	0.843					Rep4	0.892			Rep4	0.887			Rep4	0.957
				Rep5	0.935			Rep5	0.999					Rep5	0.923			Rep5	0.902			Rep5	0.97
				Rep6	0.851			Rep6	0.859									Rep6	0.911			Rep6	0.943
								Rep7	0.982									Rep7	0.926			Rep7	0.904
								Rep8	0.915									Rep8	0.904			Rep8	0.94
								Rep9	0.811									Rep9	0.869			Rep9	0.919
								Rep10	0.729									Rep10	0.882			Rep10	0.849
																						Rep11	0.847
																						Rep12	0.855
																						Rep13	0.885
																						Rep14	0.852
Participant3														Participant3
EF	L				M				H					KE	L				M				H
	Velocity(m/s)				Velocity(m/s)				Velocity(m/s)						Velocity(m/s)				Velocity(m/s)				Velocity(m/s)
Rep1	0.747			Rep1	0.787			Rep1	0.7					Rep1	0.727			Rep1	0.806			Rep1	0.725
Rep2	0.732			Rep2	0.818			Rep2	0.732					Rep2	0.798			Rep2	0.776			Rep2	0.8
Rep3	0.698			Rep3	0.787			Rep3	0.712					Rep3	0.745			Rep3	0.798			Rep3	0.79
Rep4	0.746			Rep4	0.715			Rep4	0.723									Rep4	0.733			Rep4	0.768
Rep5	0.679			Rep5	0.734			Rep5	0.655									Rep5	0.735			Rep5	0.695
Rep6	0.665			Rep6	0.76			Rep6	0.778									Rep6	0.713			Rep6	0.735
				Rep7	0.679			Rep7	0.726													Rep7	0.7
				Rep8	0.711			Rep8	0.676													Rep8	0.705
				Rep9	0.648			Rep9	0.618													Rep9	0.661
				Rep10	0.621			Rep10	0.603
				Rep11	0.662			Rep11	0.578
								Rep12	0.521
								Rep13	0.369
								Rep14	0.249
Participant4														Participant4
EF	L				M				H					KE	L				M				H
	Velocity(m/s)				Velocity(m/s)				Velocity(m/s)						Velocity(m/s)				Velocity(m/s)				Velocity(m/s)
Rep1	0.752			Rep1	0.771			Rep1	0.711					Rep1	0.603			Rep1	0.575			Rep1	0.521
Rep2	0.713			Rep2	0.771			Rep2	0.747					Rep2	0.556			Rep2	0.588			Rep2	0.544
Rep3	0.733			Rep3	0.791			Rep3	0.74					Rep3	0.656			Rep3	0.613			Rep3	0.582
				Rep4	0.748			Rep4	0.721					Rep4	0.589			Rep4	0.579			Rep4	0.615
				Rep5	0.711			Rep5	0.624									Rep5	0.579			Rep5	0.63
				Rep6	0.687			Rep6	0.622									Rep6	0.66			Rep6	0.621
				Rep7	0.609			Rep7	0.537									Rep7	0.595			Rep7	0.623
								Rep8	0.477									Rep8	0.622			Rep8	0.656
								Rep9	0.471													Rep9	0.593
																						Rep10	0.647
																						Rep11	0.624
																						Rep12	0.453
Participant5														Participant5
EF	L				M				H					KE	L				M				H
	Velocity(m/s)				Velocity(m/s)				Velocity(m/s)						Velocity(m/s)				Velocity(m/s)				Velocity(m/s)
Rep1	0.599			Rep1	0.875			Rep1	0.827					Rep1	0.385			Rep1	0.48			Rep1	0.482
Rep2	0.633			Rep2	0.813			Rep2	0.733					Rep2	0.423			Rep2	0.485			Rep2	0.461
Rep3	0.567			Rep3	0.764			Rep3	0.666					Rep3	0.418			Rep3	0.532			Rep3	0.477
Rep4	0.585			Rep4	0.594			Rep4	0.623					Rep4	0.384			Rep4	0.429			Rep4	0.421
				Rep5	0.643			Rep5	0.617					Rep5	0.41			Rep5	0.483			Rep5	0.47
				Rep6	0.571			Rep6	0.571					Rep6	0.344			Rep6	0.506			Rep6	0.414
				Rep7	0.561			Rep7	0.609					Rep7	0.379			Rep7	0.433			Rep7	0.451
				Rep8	0.603			Rep8	0.455									Rep8	0.452			Rep8	0.442
								Rep9	0.489									Rep9	0.408			Rep9	0.419
								Rep10	0.408									Rep10	0.376			Rep10	0.394
																		Rep11	0.392			Rep11	0.45
																		Rep12	0.384			Rep12	0.394
																		Rep13	0.398			Rep13	0.241
																						Rep14	0.399
																						Rep15	0.354
																						Rep16	0.398
																						Rep17	0.365
																						Rep18	0.446
																						Rep19	0.342
																						Rep20	0.428
Participant6														Participant6
EF	L				M				H					KE	L				M				H
	Velocity(m/s)				Velocity(m/s)				Velocity(m/s)						Velocity(m/s)				Velocity(m/s)				Velocity(m/s)
Rep1	0.674			Rep1	0.742			Rep1	0.722					Rep1	0.533			Rep1	0.666			Rep1	0.588
Rep2	0.705			Rep2	0.735			Rep2	0.718					Rep2	0.411			Rep2	0.529			Rep2	0.529
Rep3	0.664			Rep3	0.547			Rep3	0.799					Rep3	0.445			Rep3	0.526			Rep3	0.462
Rep4	0.738			Rep4	0.621			Rep4	0.776					Rep4	0.476			Rep4	0.523			Rep4	0.646
				Rep5	0.721			Rep5	0.809									Rep5	0.519			Rep5	0.615
				Rep6	0.731			Rep6	0.752									Rep6	0.517			Rep6	0.723
				Rep7	0.71			Rep7	0.801									Rep7	0.614			Rep7	0.646
								Rep8	0.715									Rep8	0.567			Rep8	0.623
								Rep9	0.665													Rep9	0.725
								Rep10	0.728													Rep10	0.609
								Rep11	0.753													Rep11	0.663
																						Rep12	0.594
Participant7														Participant7
EF	L				M				H					KE	L				M				H
	Velocity(m/s)				Velocity(m/s)				Velocity(m/s)						Velocity(m/s)				Velocity(m/s)				Velocity(m/s)
Rep1	1.061			Rep1	1.321			Rep1	1.019					Rep1	0.757			Rep1	0.695			Rep1	0.682
Rep2	0.995			Rep2	1.592			Rep2	0.949					Rep2	0.696			Rep2	0.853			Rep2	0.757
Rep3	1.182			Rep3	1.43			Rep3	0.869					Rep3	0.914			Rep3	0.804			Rep3	0.762
Rep4	0.979			Rep4	1.348			Rep4	0.754									Rep4	0.715			Rep4	0.738
				Rep5	1.363			Rep5	0.853									Rep5	0.728			Rep5	0.788
				Rep6	1.452			Rep6	0.936									Rep6	0.782			Rep6	0.761
								Rep7	0.977													Rep7	0.659
								Rep8	0.98													Rep8	0.768
								Rep9	0.987													Rep9	0.797
								Rep10	0.84
								Rep11	0.953
Participant8														Participant8
EF	L				M				H					KE	L				M				H
	Velocity(m/s)				Velocity(m/s)				Velocity(m/s)						Velocity(m/s)				Velocity(m/s)				Velocity(m/s)
Rep1	0.72			Rep1	0.733			Rep1	0.743					Rep1	0.732			Rep1	0.726			Rep1	0.471
Rep2	0.752			Rep2	0.865			Rep2	0.848					Rep2	0.635			Rep2	0.588			Rep2	0.541
Rep3	0.493			Rep3	0.848			Rep3	0.726					Rep3	0.687			Rep3	0.547			Rep3	0.56
				Rep4	0.828			Rep4	0.729					Rep4	0.749			Rep4	0.665			Rep4	0.555
				Rep5	0.832			Rep5	0.752									Rep5	0.703			Rep5	0.671
				Rep6	0.723			Rep6	0.708									Rep6	0.631			Rep6	0.646
								Rep7	0.722									Rep7	0.705			Rep7	0.666
								Rep8	0.438													Rep8	0.703
								Rep9	0.351													Rep9	0.594
																						Rep10	0.659
																						Rep11	0.564
Participant9														Participant9
EF	L				M				H					KE	L				M				H
	Velocity(m/s)				Velocity(m/s)				Velocity(m/s)						Velocity(m/s)				Velocity(m/s)				Velocity(m/s)
Rep1	0.929			Rep1	0.972			Rep1	0.68					Rep1	0.784			Rep1	0.672			Rep1	0.78
Rep2	0.784			Rep2	0.827			Rep2	0.758					Rep2	0.816			Rep2	0.724			Rep2	0.795
Rep3	0.876			Rep3	0.87			Rep3	0.722					Rep3	0.851			Rep3	0.728			Rep3	0.851
Rep4	0.86			Rep4	0.899			Rep4	1.025					Rep4	0.775			Rep4	0.611			Rep4	0.812
Rep5	0.651			Rep5	0.66			Rep5	0.98					Rep5	0.847			Rep5	0.735			Rep5	0.864
				Rep6	0.675			Rep6	1.107					Rep6	0.877			Rep6	0.777			Rep6	0.799
				Rep7	0.847			Rep7	0.825					Rep7	0.884			Rep7	0.637			Rep7	0.924
				Rep8	0.585			Rep8	0.803					Rep8	0.911			Rep8	0.754			Rep8	0.798
				Rep9	0.823			Rep9	0.837					Rep9	0.884			Rep9	0.723			Rep9	0.902
				Rep10	0.831			Rep10	0.738					Rep10	0.908			Rep10	0.722			Rep10	0.813
								Rep11	0.723					Rep11	0.793			Rep11	0.668			Rep11	0.864
								Rep12	0.766					Rep12	0.946			Rep12	0.699			Rep12	0.76
								Rep13	0.804					Rep13	0.906			Rep13	0.69			Rep13	0.857
								Rep14	0.767					Rep14	0.825			Rep14	0.643			Rep14	0.82
								Rep15	0.643									Rep15	0.699			Rep15	0.906
																		Rep16	0.753			Rep16	0.867
																		Rep17	0.801			Rep17	0.79
																		Rep18	0.76			Rep18	0.833
																		Rep19	0.851			Rep19	0.805
																		Rep20	0.741			Rep20	0.741
																		Rep21	0.816			Rep21	0.826
																		Rep22	0.726			Rep22	0.899
																		Rep23	0.745			Rep23	0.805
																		Rep24	0.801			Rep24	0.831
																		Rep25	0.772			Rep25	0.826
																		Rep26	0.689			Rep26	0.836
																		Rep27	0.76			Rep27	0.816
																						Rep28	0.818
																						Rep29	0.86
																						Rep30	0.805
																						Rep31	0.809
																						Rep32	0.792
																						Rep33	0.842
																						Rep34	0.878
																						Rep35	0.791
																						Rep36	0.778
																						Rep37	0.781
																						Rep38	0.822
																						Rep39	0.772
																						Rep40	0.788
																						Rep41	0.783
Participant10														Participant10
EF	L				M				H					KE	L				M				H
	Velocity(m/s)				Velocity(m/s)				Velocity(m/s)						Velocity(m/s)				Velocity(m/s)				Velocity(m/s)
Rep1	0.772			Rep1	0.819			Rep1	0.751						0.708				0.687				0.802
Rep2	0.821			Rep2	0.77			Rep2	0.805						0.848				0.805				0.84
Rep3	0.875			Rep3	0.908			Rep3	0.773						0.872				0.804				0.839
Rep4	0.744			Rep4	0.8			Rep4	0.759						0.867				0.779				0.805
Rep5	0.849			Rep5	0.893			Rep5	0.75						0.867				0.84				0.872
				Rep6	0.85			Rep6	0.7						0.835				0.846				0.804
				Rep7	0.815			Rep7	0.72										0.743				0.836
				Rep8	0.823			Rep8	0.635										0.886				0.855
				Rep9	0.833			Rep9	0.692										0.833				0.886
				Rep10	0.796			Rep10	0.484										0.617				0.92
								Rep11	0.638										0.861				0.79
								Rep12	0.634										0.751				0.754
								Rep13	0.549														0.667
								Rep14	0.409														0.784
																							0.868
																							0.902
																							0.844
																							0.258
Participant11														Participant11
EF	L				M				H					KE	L				M				H
	Velocity(m/s)				Velocity(m/s)				Velocity(m/s)						Velocity(m/s)				Velocity(m/s)				Velocity(m/s)
Rep1	0.854			Rep1	0.912			Rep1	0.695					Rep1	0.881			Rep1	0.839			Rep1	0.69
Rep2	0.77			Rep2	0.821			Rep2	0.748					Rep2	0.928			Rep2	0.895			Rep2	0.963
				Rep3	0.901			Rep3	0.801					Rep3	0.869			Rep3	0.881			Rep3	0.844
				Rep4	0.913			Rep4	0.705					Rep4	0.834			Rep4	0.879			Rep4	0.843
				Rep5	0.779			Rep5	0.732									Rep5	0.834			Rep5	0.929
								Rep6	0.683									Rep6	0.975			Rep6	0.884
								Rep7	0.583									Rep7	0.927			Rep7	0.922
																						Rep8	0.952
																						Rep9	0.911
																						Rep10	0.937
																						Rep11	0.815
Participant12														Participant12
EF	L				M				H					KE	L				M				H
	Velocity(m/s)				Velocity(m/s)				Velocity(m/s)						Velocity(m/s)				Velocity(m/s)				Velocity(m/s)
Rep1	1.174			Rep1	1.078			Rep1	0.975					Rep1	0.637			Rep1	0.673			Rep1	0.786
Rep2	0.94			Rep2	0.999			Rep2	0.951					Rep2	0.757			Rep2	0.726			Rep2	0.853
Rep3	0.932			Rep3	0.973			Rep3	0.925					Rep3	0.761			Rep3	0.882			Rep3	0.884
				Rep4	0.935			Rep4	0.901					Rep4	0.699			Rep4	0.775			Rep4	0.874
				Rep5	0.922			Rep5	0.911					Rep5	0.813			Rep5	0.813			Rep5	0.766
				Rep6	0.994			Rep6	0.87					Rep6	0.685			Rep6	0.861			Rep6	0.84
				Rep7	0.984			Rep7	0.939									Rep7	0.758			Rep7	0.809
								Rep8	0.89									Rep8	0.733			Rep8	0.881
								Rep9	0.926									Rep9	0.818			Rep9	0.806
								Rep10	0.76									Rep10	0.732			Rep10	0.873
																						Rep11	0.87
																						Rep12	0.785
																						Rep13	0.803
																						Rep14	0.83
																						Rep15	0.815
																						Rep16	0.798
																						Rep17	0.759
Participant13														Participant13
EF	L				M				H					KE	L				M				H
	Velocity(m/s)				Velocity(m/s)				Velocity(m/s)						Velocity(m/s)				Velocity(m/s)				Velocity(m/s)
Rep1	1.037			Rep1	0.964			Rep1	1.124					Rep1	0.707			Rep1	0.715			Rep1	0.585
Rep2	1.043			Rep2	0.859			Rep2	1.116					Rep2	0.687			Rep2	0.788			Rep2	0.689
Rep3	1.005			Rep3	0.725			Rep3	0.91					Rep3	0.758			Rep3	0.808			Rep3	0.67
Rep4	0.957			Rep4	0.863			Rep4	0.967					Rep4	0.799			Rep4	0.784			Rep4	0.778
				Rep5	0.876			Rep5	1.011					Rep5	0.819			Rep5	0.826			Rep5	0.72
				Rep6	0.835			Rep6	1.034									Rep6	0.842			Rep6	0.793
				Rep7	0.919			Rep7	1.05									Rep7	0.862			Rep7	0.716
				Rep8	0.848			Rep8	1.058									Rep8	0.811			Rep8	0.766
								Rep9	1.051									Rep9	0.785			Rep9	0.767
								Rep10	1.234									Rep10	0.782			Rep10	0.723
								Rep11	0.954													Rep11	0.714
								Rep12	0.798													Rep12	0.752
																						Rep13	0.734
																						Rep14	0.739
Participant14														Participant14
EF	L				M				H					KE	L				M				H
	Velocity(m/s)				Velocity(m/s)				Velocity(m/s)						Velocity(m/s)				Velocity(m/s)				Velocity(m/s)
Rep1	0.776			Rep1	0.745			Rep1	0.738					Rep1	0.662			Rep1	0.613			Rep1	0.678
Rep2	0.811			Rep2	0.811			Rep2	0.771					Rep2	0.655			Rep2	0.675			Rep2	0.784
Rep3	0.767			Rep3	0.751			Rep3	0.769					Rep3	0.72			Rep3	0.718			Rep3	0.719
Rep4	0.739			Rep4	0.702			Rep4	0.744					Rep4	0.685			Rep4	0.694			Rep4	0.746
Rep5	0.711			Rep5	0.718			Rep5	0.76					Rep5	0.774			Rep5	0.728			Rep5	0.727
				Rep6	0.709			Rep6	0.718					Rep6	0.732			Rep6	0.713			Rep6	0.742
				Rep7	0.692			Rep7	0.71					Rep7	0.721			Rep7	0.717			Rep7	0.726
				Rep8	0.666			Rep8	0.715									Rep8	0.722			Rep8	0.728
				Rep9	0.595			Rep9	0.698									Rep9	0.652			Rep9	0.75
								Rep10	0.68									Rep10	0.681			Rep10	0.712
								Rep11	0.626									Rep11	0.651			Rep11	0.717
								Rep12	0.581									Rep12	0.625			Rep12	0.681
								Rep13	0.547									Rep13	0.731			Rep13	0.662
								Rep14	0.483									Rep14	0.627			Rep14	0.686
																						Rep15	0.614
																						Rep16	0.485
																						Rep17	0.606
																						Rep18	0.574
Participant15														Participant15
EF	L				M				H					KE	L				M				H
	Velocity(m/s)				Velocity(m/s)				Velocity(m/s)						Velocity(m/s)				Velocity(m/s)				Velocity(m/s)
Rep1	0.67			Rep1	0.79			Rep1	0.729					Rep1	0.532			Rep1	0.527			Rep1	0.448
Rep2	0.732			Rep2	0.964			Rep2	0.696					Rep2	0.485			Rep2	0.395			Rep2	0.534
Rep3	0.79			Rep3	0.773			Rep3	0.822					Rep3	0.517			Rep3	0.574			Rep3	0.549
				Rep4	0.923			Rep4	0.828					Rep4	0.535			Rep4	0.46			Rep4	0.522
				Rep5	0.91			Rep5	0.81									Rep5	0.52			Rep5	0.514
				Rep6	0.872			Rep6	0.891									Rep6	0.499			Rep6	0.501
				Rep7	0.872			Rep7	0.824									Rep7	0.395			Rep7	0.518
								Rep8	0.857													Rep8	0.536
								Rep9	0.835													Rep9	0.496
								Rep10	0.82													Rep10	0.5
																						Rep11	0.479
